# Supplementary material for: Enhanced blue emission from CsPb(Br/Cl)3 perovskite nanocrystals by localized surface plasmon resonance of Au nanoparticles
Source: Royal Society of Chemistry journal article supplement (doi:10.1039/d0tc05535b), 2021-01-01
Supplement: d0tc05535b1.pdf [file d0tc05535b1.pdf]

## Supplementary Material

# **Enhanced blue emission from CsPb(Br/Cl)<sub>3</sub> perovskite nanocrystals by localized surface plasmon resonance of Au nanoparticles**

Liang Bao<sup>a</sup>, Wenqiang Liu<sup>b,c</sup>, Yonghua Chen<sup>a</sup>, Yanbo Zhang<sup>a,\*</sup>, and Yang Zhang<sup>a,\*</sup>

<sup>a</sup> *School of Physics and Electronics, Henan University, Kaifeng, Henan 475004 China*

<sup>b</sup> *School of Electronic and Electrical Engineering, Henan Normal University, Xinxiang, Henan 453007 China*

<sup>c</sup> *State Key Laboratory for Superlattices and Microstructures, Institute of Semiconductors, Chinese Academy of Sciences, Beijing 100083 China*

## **Corresponding Authors**

\*Email addresses: [ybzhang@henu.edu.cn](mailto:ybzhang@henu.edu.cn) (Y.B. Zhang), [yzhang@henu.edu.cn](mailto:yzhang@henu.edu.cn) (Y. Zhang)

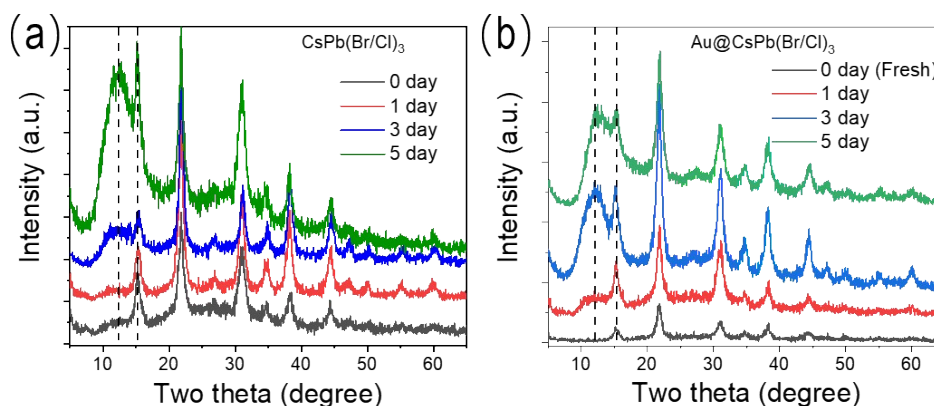

Figure S1. The time-evolution of the XRD patterns of (a) bare  $\text{CsPb}(\text{Br/Cl})_3$  NC films and (b)  $\text{Au@CsPb}(\text{Br/Cl})_3$  NC films exposed to the air for 0-5 days.

To determine the phase stability of  $\text{Au@CsPb}(\text{Br/Cl})_3$  NCs as a function of storage time in air, XRD is used to investigate the changes in the crystallinity and phase purity of bare  $\text{CsPb}(\text{Br/Cl})_3$  NCs and typical  $\text{Au@CsPb}(\text{Br/Cl})_3$  NCs prepared with  $50 \mu\text{l}$  Au NPs in the initial solution. Figure S1 shows the time-evolution of the XRD patterns of those typical samples. The time evolution of the crystallinity and phase purity of bare  $\text{CsPb}(\text{Br/Cl})_3$  NC films are shown in Figure S1 (a). For the bare  $\text{CsPb}(\text{Br/Cl})_3$  NC films exposed to the air for 2 days, all diffraction peaks are closely similar to those of the fresh (0 day) bare  $\text{CsPb}(\text{Br/Cl})_3$  NC films, corresponding to the plane indices of the cubic phase (PDF#54-0752). However, after leaving sample in ambient for 3 days, a broad peak around  $12^\circ$  appears, which was possibly due to the partial phase transition to air stable rhombohedral  $\text{Cs}_4\text{PbBr}_6$  (ICSD #025124)<sup>1</sup>. From Figure S1(b), the crystallinity and phase purity of the  $\text{Au@CsPb}(\text{Br/Cl})_3$  NC films shows the similar result of a partial phase transition. That is, after 3 days, the XRD patterns show a broad

peak around  $12^\circ$ , indicating that there is a partial phase transition in  $\text{Au}@ \text{CsPb}(\text{Br}/\text{Cl})_3$  NC film at room temperature. Obviously, the decoration of AuNPs did not improve the phase stability of  $\text{CsPb}(\text{Br}/\text{Cl})_3$ .

#### References:

- 1 L. N. Quan, R. Quintero-bermudez, O. Voznyy, G. Walters, A. Jain, J. Z. Fan, X. Zheng, Z. Yang and E. H. Sargent, *Adv. Mater.*, 2017, **29**, 1605945.
